# Supplementary material for: Near-white light emission from single crystals of cationic dinuclear gold(i) complexes with bridged diphosphine ligands
Source: Royal Society of Chemistry journal article supplement (doi:10.1039/d2dt03785h), 2022-12-26
Supplement: d2dt03785h1.pdf [file d2dt03785h1.pdf]

## Supporting Information for

# Near-white light emission from single crystals of cationic dinuclear gold(I) complexes with bridged diphosphine ligands

Masahisa Osawa,<sup>\*a</sup> Sakie Soma,<sup>a</sup> Hiroyuki Kobayashi,<sup>a</sup> Yuya Tanaka,<sup>b</sup> and Mikio Hoshino<sup>a</sup>

<sup>a</sup> Department of Applied Chemistry, Nippon Institute of Technology, Gakuendai 4-1, Miyashiro-Machi, Saitama, 345-8501, Japan

<sup>b</sup> Laboratory for Chemistry and Life Science Institute of Innovative Research, Tokyo Institute of Technology R1-27, 4259 Nagatsuta, Midori-ku, Yokohama 226-8503, Japan

## Contents

| Experimental Detail                                                                                                     | page    |
|-------------------------------------------------------------------------------------------------------------------------|---------|
| 1. General Information                                                                                                  | S3–S4   |
| 2. NMR Experiments                                                                                                      | S5–S7   |
| <b>Fig. S1</b> <sup>1</sup> H NMR spectrum of <b>1D</b> in CD <sub>2</sub> Cl <sub>2</sub> at 293 K.                    |         |
| <b>Fig. S2</b> <sup>31</sup> P { <sup>1</sup> H} NMR spectrum of <b>1D</b> in CD <sub>2</sub> Cl <sub>2</sub> at 293 K. |         |
| <b>Fig. S3</b> <sup>1</sup> H NMR spectrum of <b>2D</b> in CD <sub>2</sub> Cl <sub>2</sub> at 293 K.                    |         |
| <b>Fig. S4</b> <sup>31</sup> P { <sup>1</sup> H} NMR spectrum of <b>2D</b> in CD <sub>2</sub> Cl <sub>2</sub> at 293 K. |         |
| <b>Fig. S5</b> <sup>1</sup> H NMR spectrum of <b>3D</b> in CD <sub>2</sub> Cl <sub>2</sub> at 293 K.                    |         |
| <b>Fig. S6</b> <sup>31</sup> P { <sup>1</sup> H} NMR spectrum of <b>3D</b> in CD <sub>2</sub> Cl <sub>2</sub> at 293 K. |         |
| 3. Crystal Structure determination                                                                                      | S8–S11  |
| <b>Table S1</b> Crystallographic data for <b>1</b> •2CH <sub>2</sub> Cl <sub>2</sub> , <b>2</b> , and <b>3</b>          |         |
| <b>Fig. S7</b> Packing structures of <b>2</b> and <b>3</b> .                                                            |         |
| 4. Photophysical data                                                                                                   | S11–S12 |
| <b>Fig. S8</b> Excitation spectra of <b>2</b> and <b>3</b> .                                                            |         |
| <b>Fig. S9</b> TGA data for <b>1</b> •2C <sub>2</sub> Cl <sub>2</sub> under argon atmosphere.                           |         |
| <b>Table S2</b> Temperature-dependent changes of lifetimes for <b>2</b> and <b>3</b>                                    |         |

**Table S3** Natural transition orbital (NTO) analyses (A) for **2** and (B) for **3** at the structure determined by X-ray crystallography.

**Table S4** Calculated energy differences between the sublevels (M1, M2, and M3) of the T<sub>1</sub> and T<sub>2</sub> states for **2** (A) and **3** (B).

**Fig. S10** Experimental corrected emission (right) and excitation spectra (left) at 293 K (bold line), and calculated absorption spectra (thin line) and FC singlet and triplet transitions (solid bar). (A) for **2** and (B) for **3**.

**Table S5** Calculation results (A) for **2** and (B) for **3**: the optimized structures and excited state energy.

**Table S6** Natural transition orbital (NTO) analyses (A) for **2** and (B) for **3** at the optimized S<sub>0</sub> structure.

**Table S7** Calculated energy differences between the sublevels (M1, M2, and M3) of the S<sub>0</sub> states for **2** (A) and **3** (B).

**Table S8** Natural transition orbital (NTO) analyses (A) for **2** and (B) for **3** at the optimized S<sub>1</sub>, T<sub>1</sub>, and T<sub>2</sub> structures.

**Table S9** Calculated energy differences between the sublevels (M1, M2, and M3) of the T<sub>1</sub> and T<sub>2</sub> states for **2** (A) and **3** (B).

**Table S10** Calculated energy levels, emission energy, and oscillator strength valued of the S<sub>0</sub>, S<sub>1</sub>, T<sub>1</sub>, and T<sub>2</sub> at each optimized structure for **2** (A) and **3** (B)

**Fig. S11** Calculated energy levels of the S<sub>1</sub>, T<sub>1</sub>, and T<sub>2</sub> at each optimized structure for **3**.

**Table S11** Geometry data of **2** for the optimized S<sub>1</sub> state

**Table S12** Geometry data of **2** for the optimized T<sub>1</sub> state

**Table S13** Geometry data of **3** for the optimized T<sub>2</sub> state

**Table S14** Geometry data of **3** for the optimized S<sub>1</sub> state

**Table S15** Geometry data of **3** for the optimized T<sub>1</sub> state

**Table S16** Geometry data of **3** for the optimized T<sub>2</sub> state

## 1. General Information

$^1\text{H}$  and  $^{31}\text{P}$  NMR spectra were recorded on a Bruker AVANCE-400 spectrometer.  $^1\text{H}$  chemical shifts were referenced to residual solvent peaks.  $^{31}\text{P}$  chemical shifts were referenced to an external standard, 85% phosphoric acid ( $\delta = 0$  ppm). Elemental analyses (C and H) were carried out using an elemental analyser (Vario EL CHNOS) from Elementar. For the photo-physical studies, dissolved oxygen was removed by repeated freeze-pump-thaw cycles. Steady-state emission spectra were recorded at room temperature and at 77 K using a Hitachi F-7000 spectrofluorometer. The intensity distribution of the Xenon lamp incorporated in the spectrofluorometer was corrected using Rhodamine B in ethylene glycol. The output of the photomultiplier tube was calibrated between 300 and 850 nm with a secondary standard lamp.

Laser photolysis studies were performed using a Nd:YAG laser (Minilite II, Continuum Ltd.) equipped with second, third, and fourth harmonic generators. The laser pulses used for the emission lifetime measurements were of the third harmonic (355 nm). The duration and energy of the laser pulse were 5 ns and 8 mJ/pulse, respectively. The system used to monitor the emission decay was reported elsewhere.<sup>S1</sup>

An Optistat DN-V2 cryostat from Oxford Instruments was used to measure the emission spectra and lifetimes in the temperature range 293–83 K. Crystalline powders of samples used for emission measurements were sealed in quartz tubes with a diameter of 3 mm. Optical measurements at 77 K were carried out at the temperature of liquid nitrogen using a Dewar vessel with four optical windows. After filling the vessel with liquid nitrogen, the sample, which was placed in a quartz tube with a diameter of 5 mm, was immersed into the liquid nitrogen for rapid cooling, and luminescence spectra and lifetimes were measured.

Emission quantum yields were determined at room temperature and at 77 K using an absolute PL quantum yield measurement system (C-9920-02G, Hamamatsu).<sup>S2</sup>

A suitable crystal for **1**, **2**, and **3** was selected and mounted using Paratone-N oil on a Cryo-Loop. X-ray Diffraction data was collected at 93 K under a cold nitrogen gas stream on a Rigaku XtaLAB Pro MM007HF Synergy-DW X-ray diffractometer system, using graphite-monochromated  $\text{Cu-K}\alpha$  radiation ( $\lambda = 1.54184$  Å). Intensity data were collected by an  $\omega$ -scan with  $0.5^\circ$  oscillations for each frame. Bragg spots were integrated using the CrysAlis<sup>Pro</sup> program package.<sup>S3</sup> Structures were solved by SHELXT<sup>S4</sup> and refined by SHELXL.<sup>S5</sup> All non-disordered non-hydrogen atoms were refined with anisotropic displacement parameters. Hydrogen atoms were placed at calculated positions and refined by applying riding models. CCDC reference numbers are 2173250 for **1**, 2173251 for **2**, and 2173252 for **3**, respectively.

The PBE<sup>S6</sup>-D3(BJ)<sup>S7</sup>/TZP<sup>S8</sup> level of theory was applied for all density functional theory (DFT)

calculations using the ADF2019.303 package.<sup>S9,S10</sup> All calculations were performed with tight criteria (very good).

The ground state ( $S_0$ ), first excited singlet state ( $S_1$ ), the first excited triplet state ( $T_1$ ) and the second triplet state ( $T_2$ ) were optimized by TD-DFT calculations at gas-phase conditions.<sup>S11</sup> The input coordinates were extracted from the X-ray crystallographic data at 93 K. The perturbative spin-orbit coupling (p-SOC) calculations<sup>S10f</sup> for the first 50 singlet and triplet excited states were performed at the same level of theory. Natural transition orbitals (NTOs) were generated by orbital transformation followed by a singular value decomposition of the transition density matrix. In the NTO representation, the electronic transitions can be expressed by one single “hole (approximately HOMO) - electron (approximately LUMO)” pair with an associated eigenvalue of essentially one, even for transitions that are highly mixed in the canonical MO basis. This procedure can be a helpful strategy for obtaining a simple orbital interpretation of “what got excited to where”.<sup>S12</sup>

## 2. NMR Experiments

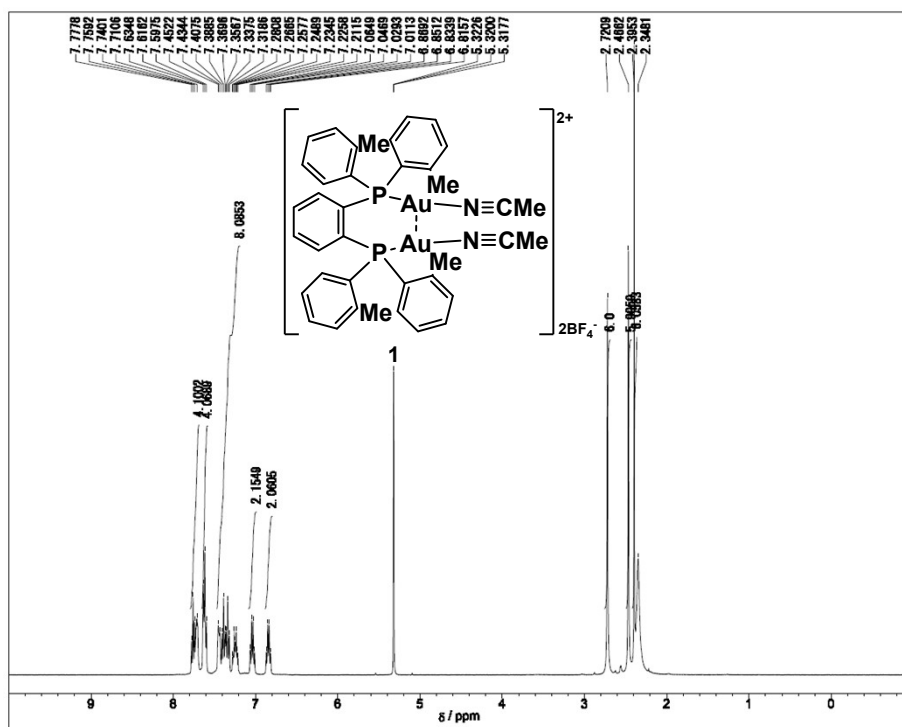

Fig. S1  $^1\text{H}$  NMR spectrum of **1** in  $\text{CD}_2\text{Cl}_2$  at 293 K.

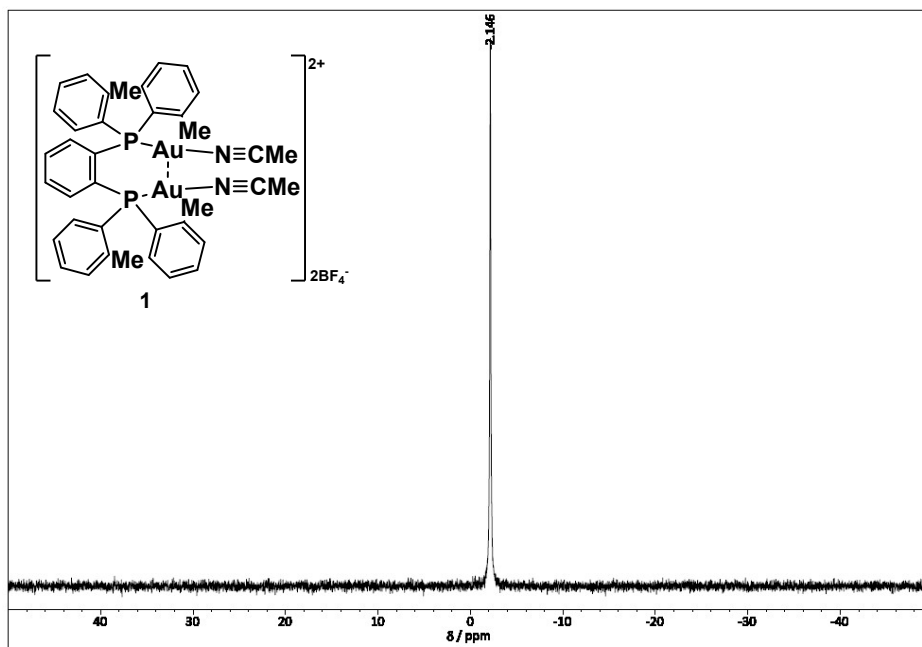

Fig. S2  $^{31}\text{P}$   $\{^1\text{H}\}$  NMR spectrum of **1** in  $\text{CD}_2\text{Cl}_2$  at 293 K.

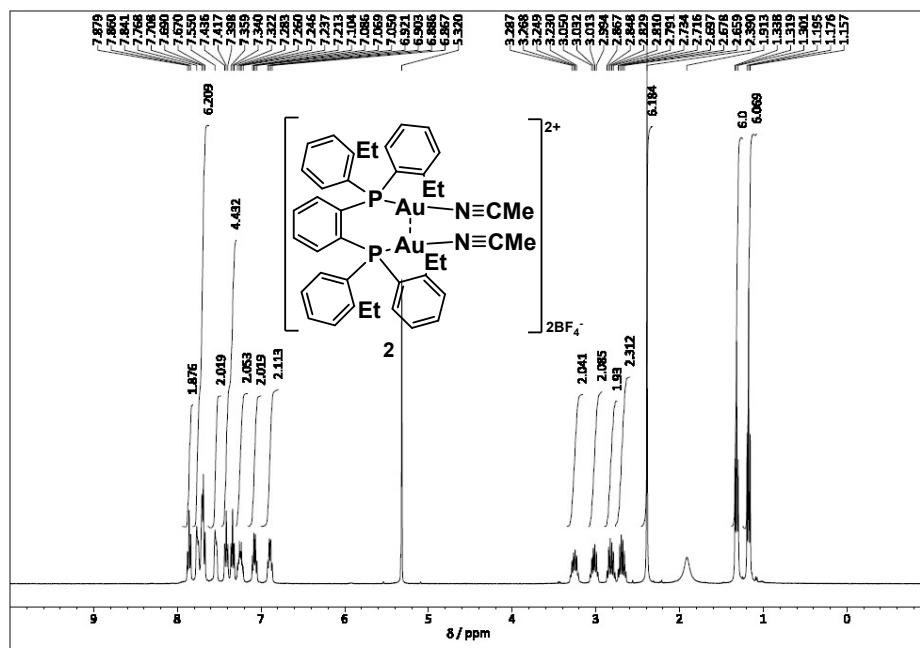

Fig. S3  $^1\text{H}$  NMR spectrum of **2** in CD<sub>2</sub>Cl<sub>2</sub> at 293 K.

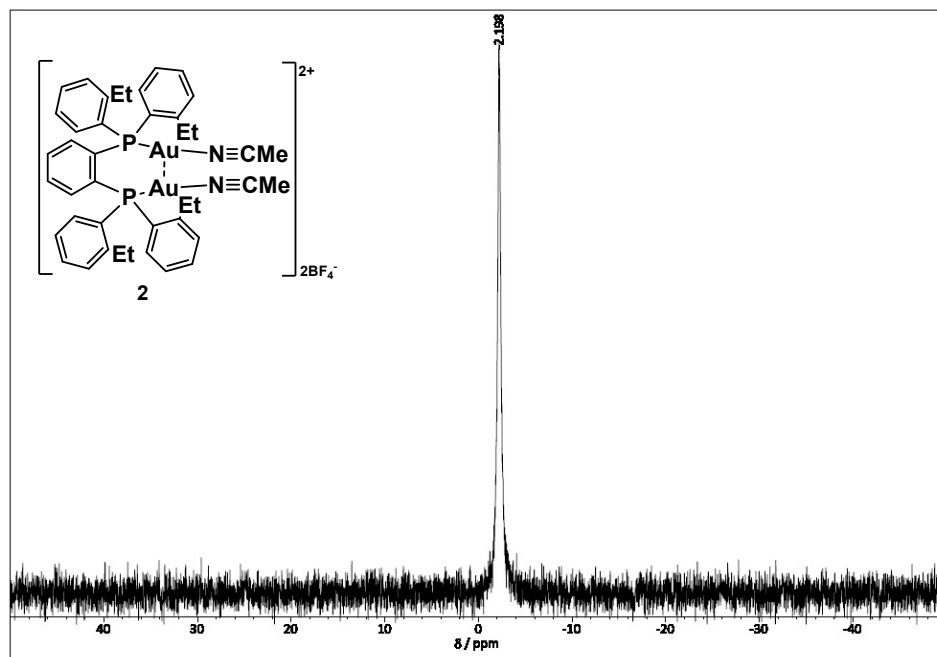

Fig. S4  $^{31}\text{P}$   $\{^1\text{H}\}$  NMR spectrum of **2** in CD<sub>2</sub>Cl<sub>2</sub> at 293 K.

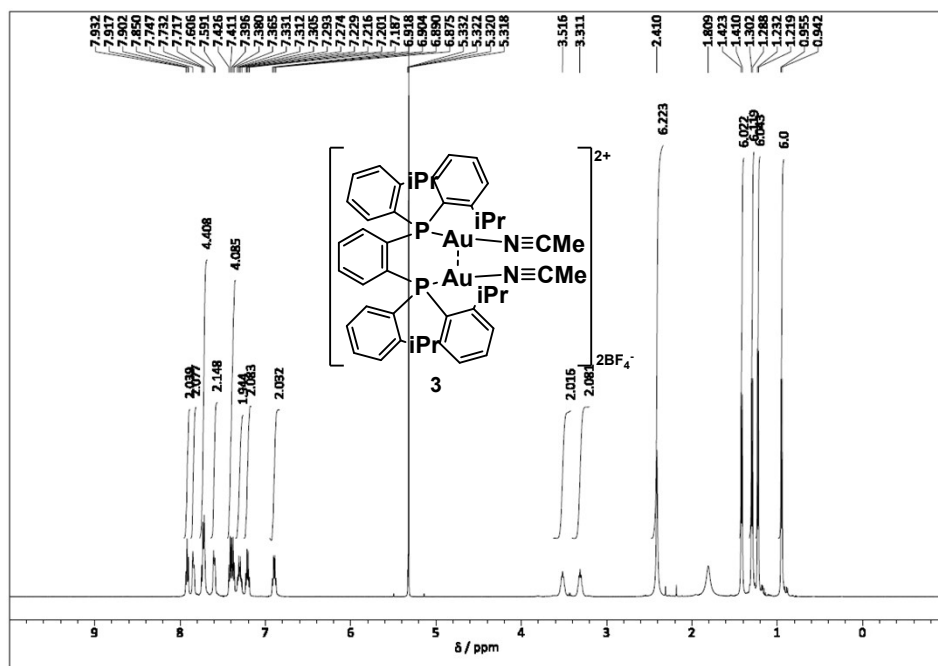

Fig. S5  $^1\text{H}$  NMR spectrum of **3** in  $\text{CD}_2\text{Cl}_2$  at 293 K.

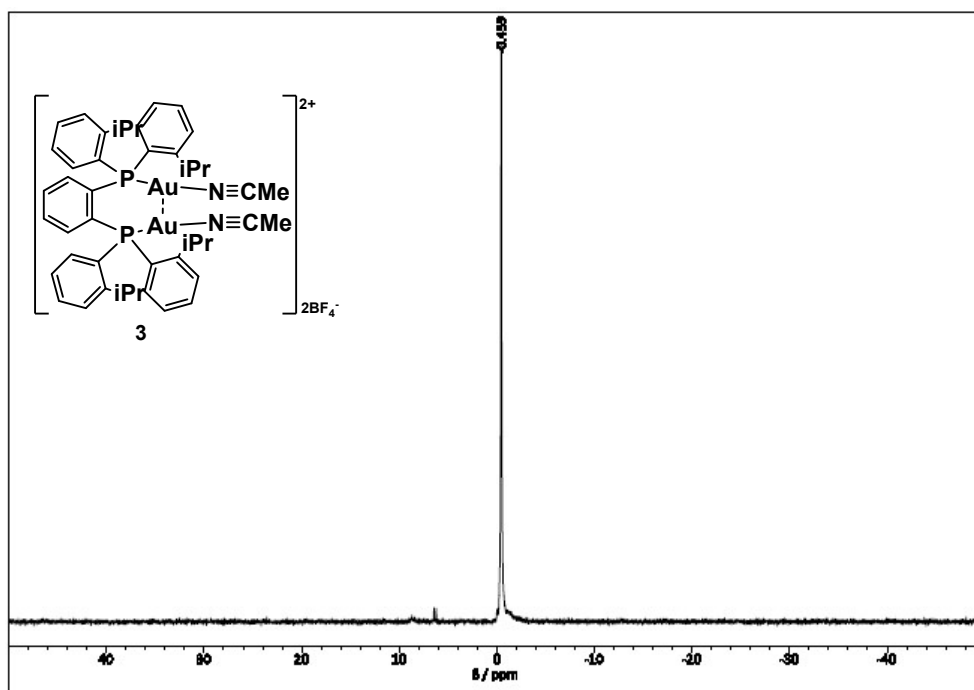

Fig. S6  $^{31}\text{P}$   $\{^1\text{H}\}$  NMR spectrum of **3** in  $\text{CD}_2\text{Cl}_2$  at 293 K.

### 3. Crystal Structure determination

**Table S1.** Crystallographic data for **1**•2CH<sub>2</sub>Cl<sub>2</sub>, **2** and **3**

|                                                                                 | <b>1</b> •2CH <sub>2</sub> Cl <sub>2</sub>                                                                                                 | <b>2</b>                                                                                           | <b>3</b> •2H <sub>2</sub> O                                                                                              |
|---------------------------------------------------------------------------------|--------------------------------------------------------------------------------------------------------------------------------------------|----------------------------------------------------------------------------------------------------|--------------------------------------------------------------------------------------------------------------------------|
| formula                                                                         | C <sub>38</sub> H <sub>38</sub> Au <sub>2</sub> N <sub>2</sub> P <sub>2</sub> •2(CH <sub>2</sub> Cl <sub>2</sub> )<br>•2(BF <sub>4</sub> ) | C <sub>42</sub> H <sub>46</sub> Au <sub>2</sub> N <sub>2</sub> P <sub>2</sub> •2(BF <sub>4</sub> ) | C <sub>46</sub> H <sub>54</sub> Au <sub>2</sub> N <sub>2</sub> P <sub>2</sub> •2(BF <sub>4</sub> )<br>•2H <sub>2</sub> O |
| formula weight                                                                  | 1322.05                                                                                                                                    | 1208.30                                                                                            | 1282.42                                                                                                                  |
| cryst syst                                                                      | triclinic                                                                                                                                  | orthorhombic                                                                                       | orthorhombic                                                                                                             |
| space group                                                                     | <i>P</i>                                                                                                                                   | <i>Fdd2</i>                                                                                        | <i>Fdd2</i>                                                                                                              |
| <i>a</i> / Å                                                                    | 11.87700(18)                                                                                                                               | 26.9142(12)                                                                                        | 28.1116(8)                                                                                                               |
| <i>b</i> / Å                                                                    | 12.1739(2)                                                                                                                                 | 24.8726(17)                                                                                        | 23.6525(7)                                                                                                               |
| <i>c</i> / Å                                                                    | 16.1311(4)                                                                                                                                 | 13.0916(6)                                                                                         | 14.2329(5)                                                                                                               |
| <i>α</i> / deg                                                                  | 96.5705(16)                                                                                                                                | 90                                                                                                 | 90                                                                                                                       |
| <i>β</i> / deg                                                                  | 98.6092(15)                                                                                                                                | 90                                                                                                 | 90                                                                                                                       |
| <i>γ</i> / deg                                                                  | 99.5936(13)                                                                                                                                | 90                                                                                                 | 90                                                                                                                       |
| <i>V</i> / Å <sup>3</sup>                                                       | 2250.50(7)                                                                                                                                 | 8763.9(8)                                                                                          | 9463.6(5)                                                                                                                |
| <i>Z</i>                                                                        | 2                                                                                                                                          | 8                                                                                                  | 8                                                                                                                        |
| <i>d</i> <sub>calcd</sub> / g cm <sup>-3</sup>                                  | 1.951                                                                                                                                      | 1.832                                                                                              | 1.800                                                                                                                    |
| <i>T</i> / K                                                                    | 93(2)                                                                                                                                      | 93(2)                                                                                              | 93(2)                                                                                                                    |
| radiation                                                                       | Cu Kα                                                                                                                                      | Cu Kα                                                                                              | Cu Kα                                                                                                                    |
|                                                                                 | (λ = 1.54184 Å)                                                                                                                            | (λ = 1.54184 Å)                                                                                    | (λ = 1.54184 Å)                                                                                                          |
| <i>μ</i> / cm <sup>-1</sup>                                                     | 15.513                                                                                                                                     | 13.672                                                                                             | 12.718                                                                                                                   |
| diffractometer                                                                  | Rigaku XtaLAB Pro<br>MM007HF                                                                                                               | Rigaku XtaLAB Pro<br>MM007HF                                                                       | Rigaku XtaLAB Pro<br>MM007HF                                                                                             |
| max 2θ / deg                                                                    | 75                                                                                                                                         | 75                                                                                                 | 75                                                                                                                       |
| reflns colled                                                                   | 42133                                                                                                                                      | 10347                                                                                              | 12087                                                                                                                    |
| indep reflns                                                                    | 9088<br>( <i>R</i> <sub>int</sub> = 0.0554)                                                                                                | 4461<br>( <i>R</i> <sub>int</sub> = 0.0572)                                                        | 4860<br>( <i>R</i> <sub>int</sub> = 0.0268)                                                                              |
| no. of param refined                                                            | 547                                                                                                                                        | 265                                                                                                | 294                                                                                                                      |
| <i>RI</i> , <sup>[a]</sup> <i>wR2</i> ( <i>I</i> > 2σ <i>I</i> ) <sup>[b]</sup> | 0.0448, 0.1078                                                                                                                             | 0.0611, 0.1673                                                                                     | 0.0239, 0.0616                                                                                                           |
| <i>S</i>                                                                        | 1.090                                                                                                                                      | 1.053                                                                                              | 1.073                                                                                                                    |

[a]  $RI = \sum ||F_o| - |F_c|| / \sum |F_o|$ . [b]  $wR2 = [\sum w(|F_o| - |F_c|)^2 / \sum w|F_o|^2]^{1/2}$



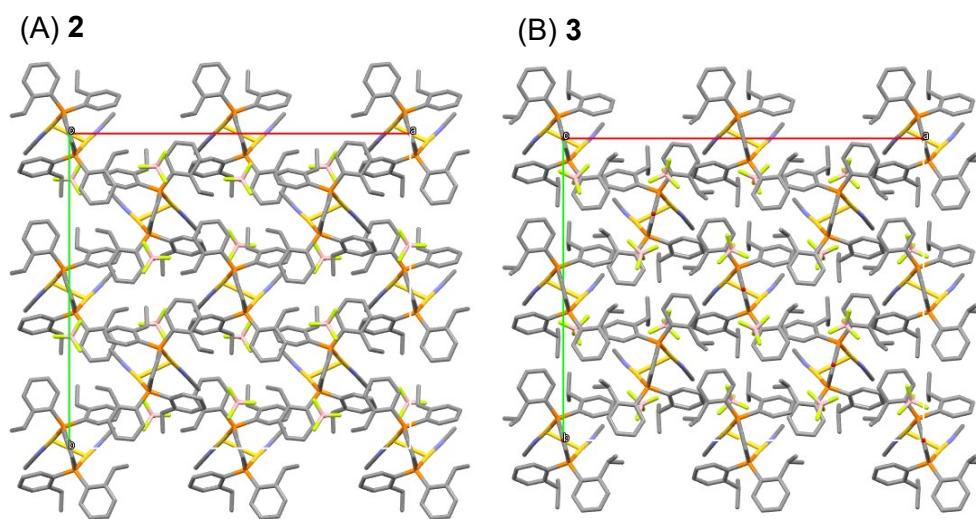

**Fig. S7** Packing structures of **2** (A) and **3** (B); view along c axis.

#### 4. Photophysical Properties

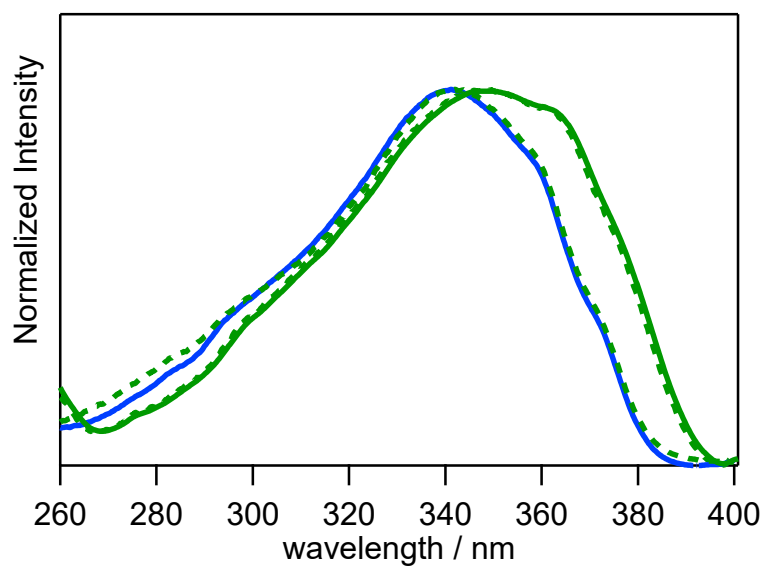

**Fig. S8** Excitation spectra of **1** and **2**: the monitoring wavelength at  $\lambda_{em} = 415$  nm (blue solid line) and 600 nm (blue dashed) for **1**, and 430 nm (green solid) and 630 nm (green solid) for **2** at 293 K .

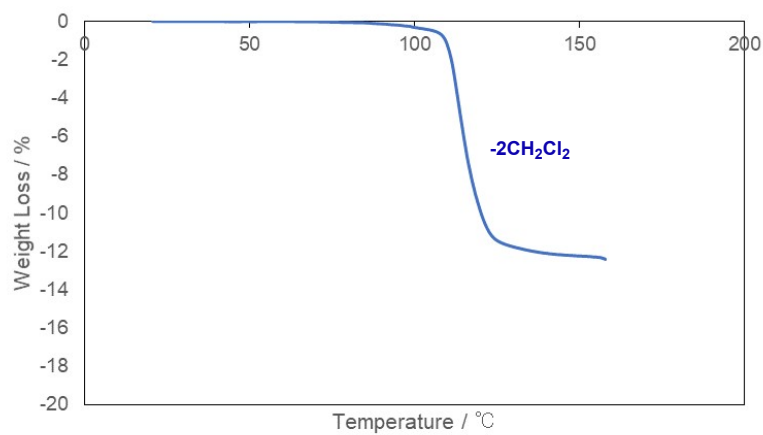

**Fig. S10** TGA data for **1•2C<sub>2</sub>Cl<sub>2</sub>** under argon atmosphere with a heating rate of 20°C min<sup>-1</sup>.

**Table S2.** Temperature-dependent changes of lifetimes

(A) Complex **2**

| Temp. / K | $\tau$ / $\mu$ s<br>at 430 nm | $\tau$ / $\mu$ s<br>at 600 nm |
|-----------|-------------------------------|-------------------------------|
| 293.0     | 3.9                           | 3.8                           |
| 273.6     | 7.5                           | 7.4                           |
| 254.2     | 13.0                          | 12.8                          |
| 234.9     | 18.4                          | 18.0                          |
| 215.5     | 23.0                          | 23.0                          |
| 196.1     | 26.0                          | 26.0                          |
| 176.7     | 24.0                          | 24.0                          |
| 157.3     | 23.7                          | 23.5                          |
| 138.0     | 23.4                          | -                             |
| 118.6     | 23.8                          | -                             |
| 99.2      | 24.1                          | -                             |
| 83.9      | 24.4                          | -                             |
| 77.0      | 26.2                          | -                             |

(B) Complex 3

| Temp. / K | $\tau$ / $\mu\text{s}$<br>at 430 nm | $\tau$ / $\mu\text{s}$<br>at 500 nm | $\tau$ / $\mu\text{s}$<br>at 590 nm |
|-----------|-------------------------------------|-------------------------------------|-------------------------------------|
| 322.1     | 9.2                                 | 9.2                                 | 9.7                                 |
| 309.5     | 10.6                                | 10.7                                | 11.4                                |
| 293.0     | 12.8                                | 12.8                                | 13.0                                |
| 263.9     | 17.9                                | 17.7                                | 17.9                                |
| 234.9     | 25.1                                | 24.8                                | 25.0                                |
| 205.8     | 33.6                                | 33.4                                | 33.7                                |
| 176.7     | 41.9                                | 42.4                                | 41.0                                |
| 147.6     | 49.1                                | 49.1                                | 44.6                                |
| 118.6     | 52.2                                | 53.7                                | -                                   |
| 108.9     | 52.7                                | 55.1                                | -                                   |
| 99.2      | 53.2                                | 55.3                                | -                                   |
| 94.3      | 53.4                                | 55.3                                | -                                   |
| 89.5      | 53.4                                | 55.2                                | -                                   |
| 83.8      | 53.5                                | 55.2                                | -                                   |
| 77.0      | 53.5                                | 55.3                                | -                                   |

**Table S3** Natural transition orbital (NTO) analyses (A) for **2** and (B) for **3** at the structure determined by X-ray crystallography

(A) Complex **2**

|                | $\lambda_{\text{cal}} /$<br>eV<br>(nm) | $f$    | NTO pairs<br>Isovalue = 0.035                                                       | Generation<br>probability<br>(%) | Main<br>Character         |
|----------------|----------------------------------------|--------|-------------------------------------------------------------------------------------|----------------------------------|---------------------------|
|                |                                        |        | Hole (red and blue)<br>Electron (cyan and orange)                                   |                                  |                           |
| T <sub>2</sub> | 3.296<br>(376)                         | 0.0002 | 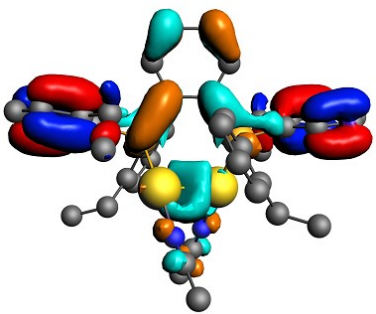   | 99.8                             | ILCT<br>(LMMCT,<br>LL'CT) |
| S <sub>1</sub> | 3.226<br>(384)                         | 0.0220 |   | 99.0                             | ILCT<br>(MC,<br>MLCT)     |
| T <sub>1</sub> | 3.116<br>(398)                         | 0.0005 |  | 99.8                             | ILCT<br>(MC,<br>MLCT)     |

## (B) Complex 3

|                | $\lambda_{\text{cal}} /$<br>eV<br>(nm) | $f$    | NTO pairs<br>Isovalue = 0.035                                                       | Generation<br>probability<br>(%) | Main<br>Character                |
|----------------|----------------------------------------|--------|-------------------------------------------------------------------------------------|----------------------------------|----------------------------------|
|                |                                        |        | Hole (red and blue)<br>Electron (cyan and orange)                                   |                                  |                                  |
| T <sub>2</sub> | 3.194<br>(388)                         | 0.0004 | 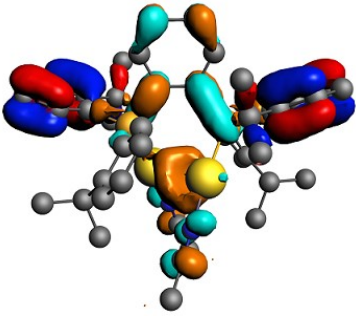   | 99.9                             | ILCT<br>(LMMCT,<br>LL'CT)        |
| S <sub>1</sub> | 3.183<br>(390)                         | 0.0132 |   | 99.2                             | ILCT<br>(MC,<br>MLCT)            |
| T <sub>1</sub> | 3.105<br>(399)                         | 0.0004 |  | 99.8                             | ILCT<br>(MC,<br>LL'CT,<br>LMMCT) |

**Table S4** Calculated energy differences between the sublevels (M1, M2, and M3) of the T<sub>1</sub> and T<sub>2</sub> states at the crystal structures for **2** (A) and **3** (B).

**(A) 2**

| T <sub>1</sub> | $E^a$ / eV | Singlet and triplet contribution / %          |
|----------------|------------|-----------------------------------------------|
| M1             | 3.10598    | T <sub>1</sub> (97.6) + T <sub>4</sub> (1.08) |
| M2             | 3.10665    | T <sub>1</sub> (98.0) + T <sub>4</sub> (1.08) |
| M3             | 3.10665    | T <sub>1</sub> (98.2) + S <sub>6</sub> (0.36) |

| T <sub>2</sub> | $E^a$ / eV | Singlet and triplet contribution / %                                  |
|----------------|------------|-----------------------------------------------------------------------|
| M1             | 3.28868    | T <sub>2</sub> (96.7) + S <sub>2</sub> (1.04) + S <sub>8</sub> (0.7)  |
| M2             | 3.28868    | T <sub>2</sub> (97.5) + T <sub>7</sub> (1.08) + T <sub>3</sub> (0.4)  |
| M3             | 3.28891    | T <sub>2</sub> (97.3) + S <sub>1</sub> (0.52) + S <sub>3</sub> (0.30) |

**(B) 3**

| T <sub>1</sub> | $E^a$ / eV | Singlet and triplet contribution / %                                  |
|----------------|------------|-----------------------------------------------------------------------|
| M1             | 3.09282    | T <sub>1</sub> (97.0) + T <sub>4</sub> (1.42)                         |
| M2             | 3.09378    | T <sub>1</sub> (97.3) + T <sub>4</sub> (1.42) + T <sub>3</sub> (0.91) |
| M3             | 3.09466    | T <sub>1</sub> (97.6) + S <sub>5</sub> (0.48) + S <sub>3</sub> (0.22) |

| T <sub>2</sub> | $E^a$ / eV | Singlet and triplet contribution / %                                  |
|----------------|------------|-----------------------------------------------------------------------|
| M1             | 3.18469    | T <sub>1</sub> (96.1) + S <sub>1</sub> (1.12)                         |
| M2             | 3.18482    | T <sub>1</sub> (94.5) + S <sub>1</sub> (2.94) + T <sub>3</sub> (0.91) |
| M3             | 3.18491    | T <sub>1</sub> (96.8) + S <sub>6</sub> (1.05) + S <sub>2</sub> (0.56) |

<sup>a</sup> Energy

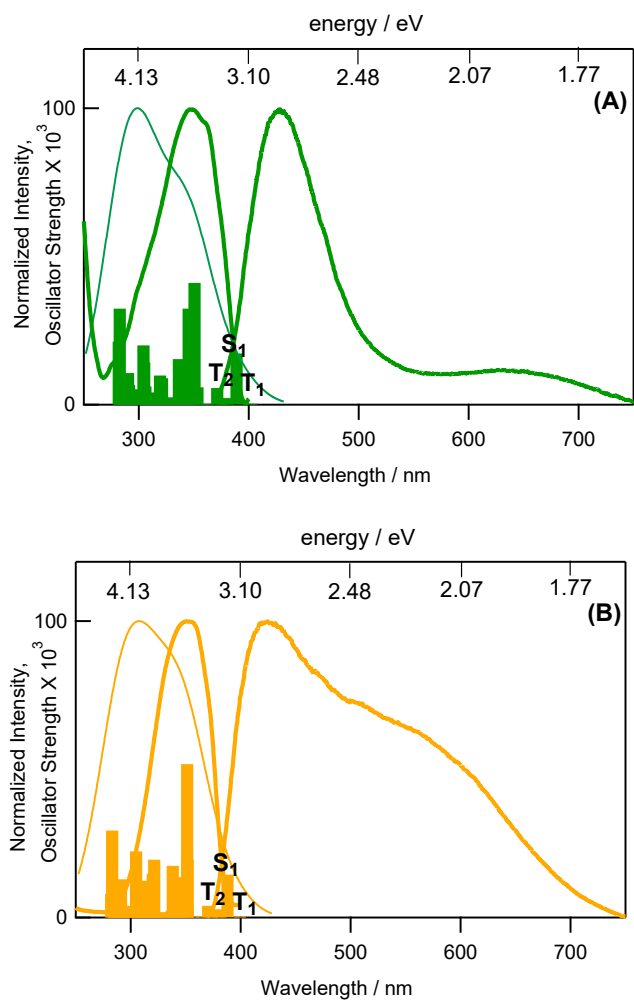

**Fig. S10** Experimental corrected emission (right) and excitation spectra (left) at 293 K (bold line), and calculated absorption spectra (thin line) and FC singlet and triplet transitions (solid bar) at the optimized  $S_0$  structures. (A) for **2** and (B) for **3**.

**Table S5** Calculation results (A) for **2** and (B) for **3**: the optimized structures and excited state energy

(A)

|                                                    |                                                                                                        |                                                                                                            |                                                                                                             |                                                                                                             |
|----------------------------------------------------|--------------------------------------------------------------------------------------------------------|------------------------------------------------------------------------------------------------------------|-------------------------------------------------------------------------------------------------------------|-------------------------------------------------------------------------------------------------------------|
| The X-ray and the optimized structures of <b>2</b> | 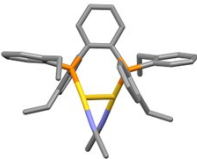<br>Crystal structure | <br><b>S<sub>0</sub></b> | <br><b>S<sub>1</sub></b> | <br><b>T<sub>1</sub></b> |
| Au–Au bond distance / Å                            | 2.9841(8)                                                                                              | 3.063                                                                                                      | 2.991                                                                                                       | 2.762                                                                                                       |
| Total Bonding Energy / eV                          | -551.4314                                                                                              | -568.3279                                                                                                  | -567.9912                                                                                                   | -567.7228                                                                                                   |
| Excited State Energy / eV                          | –                                                                                                      | –                                                                                                          | -565.3606                                                                                                   | -565.6523                                                                                                   |
| Excitation Energy / eV                             | –                                                                                                      | –                                                                                                          | 2.6306                                                                                                      | 2.0706                                                                                                      |



(B)

|                                                    |                                                                                                        |                                                                                                            |                                                                                                             |                                                                                                             |
|----------------------------------------------------|--------------------------------------------------------------------------------------------------------|------------------------------------------------------------------------------------------------------------|-------------------------------------------------------------------------------------------------------------|-------------------------------------------------------------------------------------------------------------|
| The X-ray and the optimized structures of <b>3</b> | 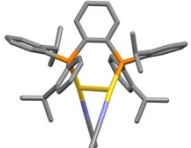<br>Crystal structure | <br><b>S<sub>0</sub></b> | <br><b>S<sub>1</sub></b> | <br><b>T<sub>1</sub></b> |
| Au–Au bond distance / Å                            | 3.0457(8)                                                                                              | 3.101                                                                                                      | 3.043                                                                                                       | 2.782                                                                                                       |
| Total Bonding Energy / eV                          | -616.4976                                                                                              | -634.8326                                                                                                  | -634.3502                                                                                                   | -634.2131                                                                                                   |
| Excited State Energy / eV                          | –                                                                                                      | –                                                                                                          | -632.0046                                                                                                   | -632.1523                                                                                                   |
| Excitation Energy / eV                             | –                                                                                                      | –                                                                                                          | 2.3457                                                                                                      | 2.0608                                                                                                      |

**Table S6** Natural transition orbital (NTO) analyses (A) for **2** and (B) for **3** at the optimized  $S_0$  structure(A) Complex **2**

|                | $\lambda_{\text{cal}} /$<br>eV<br>(nm) | $f$    | NTO pairs<br>Isovalue = 0.035                                                       |                            | Generation<br>probability<br>(%) | Main<br>Character         |
|----------------|----------------------------------------|--------|-------------------------------------------------------------------------------------|----------------------------|----------------------------------|---------------------------|
|                |                                        |        | Hole (red and blue)                                                                 | Electron (cyan and orange) |                                  |                           |
| T <sub>2</sub> | 3.262<br>(380)                         | 0.0002 | 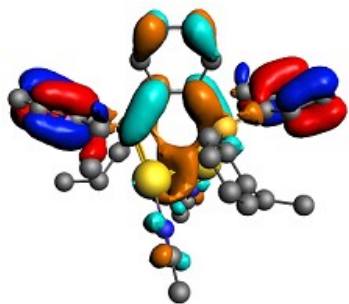   |                            | 99.8                             | ILCT<br>(LMMCT,<br>LL'CT) |
| S <sub>1</sub> | 3.197<br>(388)                         | 0.0174 |   |                            | 99.7                             | ILCT<br>(MC,<br>MLCT)     |
| T <sub>1</sub> | 3.093<br>(401)                         | 0.0003 |  |                            | 99.7                             | ILCT<br>(MC,<br>MLCT)     |

## (B) Complex 3

|                | $\lambda_{\text{cal}} /$<br>eV<br>(nm) | $f$    | NTO pairs<br>Isovalue = 0.035                                                       | Generation<br>probability<br>(%) | Main<br>Character                |
|----------------|----------------------------------------|--------|-------------------------------------------------------------------------------------|----------------------------------|----------------------------------|
|                |                                        |        | Hole (red and blue)<br>Electron (cyan and orange)                                   |                                  |                                  |
| T <sub>2</sub> | 3.255<br>(381)                         | 0.0002 | 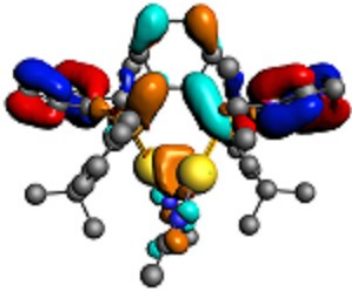   | 99.8                             | ILCT<br>(LMMCT,<br>LL'CT)        |
| S <sub>1</sub> | 3.203<br>(387)                         | 0.0145 |   | 99.4                             | ILCT<br>(MC,<br>MLCT)            |
| T <sub>1</sub> | 3.114<br>(398)                         | 0.0003 |  | 99.7                             | ILCT<br>(MC,<br>LL'CT,<br>LMMCT) |

**Table S7** Calculated energy differences between the sublevels (M1, M2, and M3) of the  $S_0$  states for **2** (A) and **3** (B).

**(A) 2**

| $S_0$<br>at $T_1$ structure | $E^a / \text{eV}$ | Singlet and triplet contribution /<br>% |
|-----------------------------|-------------------|-----------------------------------------|
| M1                          | 3.084100          | $T_1(99.6)$                             |
| M2                          | 3.084800          | $T_1(99.6)$                             |
| M3                          | 3.085490          | $T_1(98.5) + S_5(0.24)$                 |

| $S_0$<br>at $T_2$ structure | $E^a / \text{eV}$ | Singlet and triplet contribution /<br>% |
|-----------------------------|-------------------|-----------------------------------------|
| M1                          | 3.255870          | $T_2(98.0)$                             |
| M2                          | 3.255950          | $T_2(97.7) + S_8(0.4) + S_2(0.2)$       |
| M3                          | 3.255990          | $T_2(97.7) + S_1(0.6) + S_3(0.3)$       |

**(B) 3**

| $S_0$<br>at $T_1$ structure | $E^a / \text{eV}$ | Singlet and triplet contribution /<br>% |
|-----------------------------|-------------------|-----------------------------------------|
| M1                          | 3.105290          | $T_1(98.4)$                             |
| M2                          | 3.106050          | $T_1(97.4)$                             |
| M3                          | 3.106570          | $T_1(98.4) + S_5(0.25)$                 |

| $S_0$<br>at $T_2$ structure | $E^a / \text{eV}$ | Singlet and triplet contribution /<br>% |
|-----------------------------|-------------------|-----------------------------------------|
| M1                          | 3.249610          | $T_1(99.6)$                             |
| M2                          | 3.249710          | $T_1(99.7)$                             |
| M3                          | 3.249790          | $T_1(97.3) + S_1(1.0)$                  |

<sup>a</sup> Energy

**Table S8** Natural transition orbital (NTO) analyses (A) for **2** and (B) for **3** at the optimized S<sub>1</sub> and T<sub>1</sub> structures.

**(A) Complex 2**

|                | $\lambda_{\text{cal}} /$<br>eV<br>(nm) | $f$    | NTO pairs<br>Isovalue = 0.035                                                      | Generation<br>probability<br>(%) | Main<br>Character |
|----------------|----------------------------------------|--------|------------------------------------------------------------------------------------|----------------------------------|-------------------|
|                |                                        |        | Hole (red and blue)<br>Electron (cyan and orange)                                  |                                  |                   |
| S <sub>1</sub> | 2.598<br>(477)                         | 0.0036 | 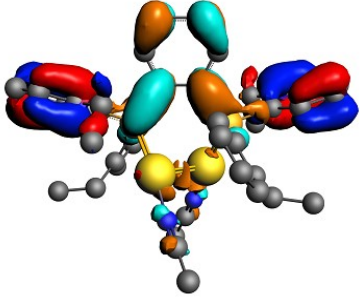  | 97.7                             | ILCT              |
| T <sub>1</sub> | 2.071<br>(599)                         | 0.0001 |  | 99.9                             | MLCT              |

(B) Complex 3

|                | $\lambda_{\text{cal}} /$<br>eV<br>(nm) | $f$    | NTO pairs<br>Isovalue = 0.035                                                      |                            | Generation<br>probability<br>(%) | Main<br>Character |
|----------------|----------------------------------------|--------|------------------------------------------------------------------------------------|----------------------------|----------------------------------|-------------------|
|                |                                        |        | Hole (red and blue)                                                                | Electron (cyan and orange) |                                  |                   |
| S <sub>1</sub> | 2.346<br>(528)                         | 0.0010 | 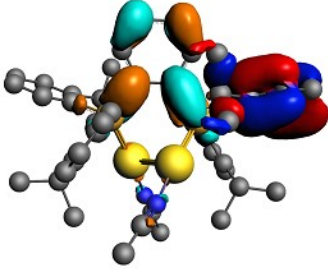  |                            | 99.8                             | ILCT              |
| T <sub>1</sub> | 2.061<br>(602)                         | 0.0001 |  |                            | 99.9                             | MLCT              |

**Table S9** Calculated energy differences between the sublevels (M1, M2, and M3) of the T<sub>1</sub> states for **2** (A) and **3** (B).

**(A) complex 2**

| T <sub>1</sub><br>at T <sub>1</sub> structure | <i>E<sup>a</sup></i> / eV | Singlet and triplet contribution /<br>%       |
|-----------------------------------------------|---------------------------|-----------------------------------------------|
| M1                                            | 2.06640                   | T <sub>1</sub> (99.6)                         |
| M2                                            | 2.06650                   | T <sub>1</sub> (99.6)                         |
| M3                                            | 2.06666                   | T <sub>1</sub> (99.6) + S <sub>6</sub> (0.36) |

**(B) complex 3**

| T <sub>1</sub><br>at T <sub>1</sub> structure | <i>E<sup>a</sup></i> / eV | Singlet and triplet contribution /<br>%       |
|-----------------------------------------------|---------------------------|-----------------------------------------------|
| M1                                            | 2.05644                   | T <sub>1</sub> (99.6)                         |
| M2                                            | 2.05656                   | T <sub>1</sub> (99.6)                         |
| M3                                            | 2.05698                   | T <sub>1</sub> (99.6) + S <sub>11</sub> (0.1) |

<sup>a</sup>Energy

**Table S10** Calculated energy levels, emission energy, and oscillator strength valued of the S<sub>0</sub>, S<sub>1</sub>, and T<sub>1</sub> at each optimized structure for **2** (A) and **3** (B)

(A)

| Structure                       | Excited state         | Energy / eV      | Emission energy / eV<br>(nm) | Oscillator strength, <i>f</i> |
|---------------------------------|-----------------------|------------------|------------------------------|-------------------------------|
| Optimized <b>T</b> <sub>1</sub> | T <sub>2</sub>        | -564.9918        | 2.7310 (454)                 | 0.0001                        |
|                                 | S <sub>1</sub>        | -565.5555        | 2.1673 (572)                 | 0.0082                        |
|                                 | <b>T</b> <sub>1</sub> | <b>-565.6522</b> | <b>2.0706 (599)</b>          | <b>0.0001</b>                 |
|                                 | S <sub>0</sub>        | -567.7228        | -                            | -                             |
| Optimized <b>S</b> <sub>1</sub> | T <sub>2</sub>        | -565.2229        | 2.7683 (474)                 | 0.0001                        |
|                                 | <b>S</b> <sub>1</sub> | <b>-565.3928</b> | <b>2.5984 (477)</b>          | <b>0.0036</b>                 |
|                                 | T <sub>1</sub>        | -565.4291        | 2.5621 (484)                 | 0.0000                        |
|                                 | S <sub>0</sub>        | -567.9912        | -                            | -                             |
| Optimized <b>S</b> <sub>0</sub> | T <sub>2</sub>        | -565.0656        | 3.2619 (380)                 | 0.0001                        |
|                                 | S <sub>1</sub>        | -565.1024        | 3.1971 (388)                 | 0.0220                        |
|                                 | T <sub>1</sub>        | -565.2345        | 3.0934 (401)                 | 0.0005                        |
|                                 | <b>S</b> <sub>0</sub> | <b>-568.3279</b> | -                            | -                             |

(B)

| Structure                       | Excited state         | Energy / eV      | Emission energy / eV<br>(nm) | Oscillator strength, <i>f</i> |
|---------------------------------|-----------------------|------------------|------------------------------|-------------------------------|
| Optimized <b>T</b> <sub>1</sub> | T <sub>2</sub>        | -631.5021        | 2.7110 (457)                 | 0.0000                        |
|                                 | S <sub>1</sub>        | -632.0606        | 2.1525 (576)                 | 0.0091                        |
|                                 | <b>T</b> <sub>1</sub> | <b>-632.1523</b> | <b>2.0608 (602)</b>          | <b>0.0001</b>                 |
|                                 | S <sub>0</sub>        | -634.2131        | -                            | -                             |
| Optimized <b>S</b> <sub>1</sub> | T <sub>2</sub>        | -631.6769        | 2.6733 (464)                 | 0.0001                        |
|                                 | <b>S</b> <sub>1</sub> | <b>-632.0045</b> | <b>2.3457 (529)</b>          | <b>0.0036</b>                 |
|                                 | T <sub>1</sub>        | -632.0196        | 2.3306 (532)                 | 0.0000                        |
|                                 | S <sub>0</sub>        | -634.3502        | -                            | -                             |
| Optimized <b>S</b> <sub>0</sub> | T <sub>2</sub>        | -631.5772        | 3.2553 (381)                 |                               |
|                                 | S <sub>1</sub>        | -631.6291        | 3.2034 (387)                 |                               |
|                                 | T <sub>1</sub>        | -631.7182        | 3.1143 (398)                 |                               |
|                                 | <b>S</b> <sub>0</sub> | <b>-634.8326</b> | -                            | -                             |



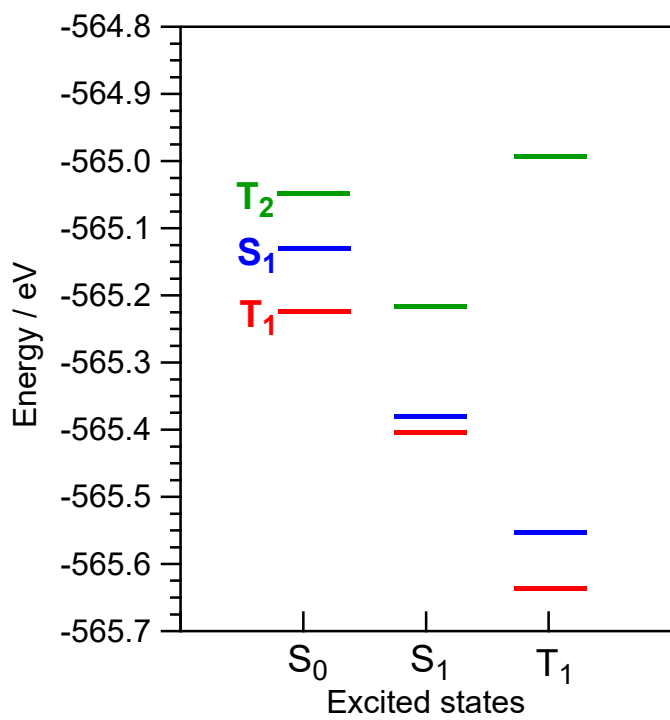

Fig. S11 Calculated energy levels of the S<sub>1</sub>, T<sub>1</sub>, and T<sub>2</sub> at each optimized structure for **2**

**Table S11** Geometry data of **2** for the optimized  $S_1$  state

|    |           |           |           |
|----|-----------|-----------|-----------|
| Au | 14.834527 | 13.021895 | 7.623011  |
| P  | 13.879044 | 14.146937 | 5.872142  |
| C  | 13.763516 | 13.791180 | 3.158951  |
| H  | 13.992920 | 14.855709 | 3.134768  |
| C  | 11.143129 | 14.523456 | 5.627390  |
| H  | 11.287912 | 13.929158 | 4.723951  |
| C  | 13.635538 | 13.143675 | 4.416278  |
| N  | 15.969647 | 12.188400 | 9.139456  |
| C  | 13.255802 | 16.039937 | 8.482061  |
| H  | 14.196194 | 15.597117 | 8.122415  |
| H  | 13.086144 | 15.596778 | 9.478161  |
| C  | 9.703770  | 15.738721 | 7.128278  |
| H  | 8.713278  | 16.103305 | 7.406794  |
| C  | 12.107880 | 15.638305 | 7.581767  |
| C  | 10.812774 | 16.069119 | 7.908366  |
| H  | 10.676102 | 16.697869 | 8.791804  |
| C  | 9.867498  | 14.960537 | 5.980893  |
| H  | 9.010426  | 14.708148 | 5.354882  |
| C  | 13.610151 | 13.127465 | 1.956066  |
| H  | 13.725317 | 13.670540 | 1.018273  |
| C  | 12.261903 | 14.850188 | 6.416013  |
| C  | 16.211831 | 15.560822 | 4.976149  |
| C  | 16.884403 | 16.751723 | 4.573413  |
| H  | 17.944903 | 16.683301 | 4.322135  |
| C  | 14.831377 | 15.637239 | 5.306352  |
| C  | 17.012928 | 14.297035 | 5.015216  |
| H  | 17.585727 | 14.225742 | 4.075701  |
| H  | 16.357108 | 13.420019 | 5.060336  |
| C  | 14.179775 | 16.862242 | 5.185224  |
| H  | 13.113716 | 16.930362 | 5.402591  |
| C  | 18.002617 | 14.279128 | 6.199235  |
| H  | 18.586351 | 13.349904 | 6.175226  |
| H  | 17.460820 | 14.325856 | 7.154126  |
| H  | 18.701736 | 15.124402 | 6.158127  |
| C  | 16.228075 | 17.969509 | 4.469765  |
| H  | 16.764756 | 18.862346 | 4.147844  |
| C  | 14.866072 | 18.029170 | 4.771113  |
| H  | 14.320422 | 18.970165 | 4.687322  |
| C  | 16.589900 | 11.632702 | 9.947278  |
| C  | 17.365171 | 10.944707 | 10.953729 |
| H  | 17.689195 | 9.9705278 | 10.561894 |
| H  | 16.758423 | 10.78847  | 11.856807 |
| H  | 18.251800 | 11.53917  | 11.215808 |
| C  | 13.438115 | 17.555858 | 8.631370  |
| H  | 13.658615 | 18.027194 | 7.663928  |
| H  | 14.271283 | 17.776148 | 9.311575  |
| H  | 12.539422 | 18.038302 | 9.037616  |
| P  | 13.035156 | 10.725663 | 5.872142  |
| C  | 13.150684 | 11.081420 | 3.158951  |
| H  | 12.921280 | 10.016891 | 3.134768  |
| C  | 15.771071 | 10.349144 | 5.627390  |
| H  | 15.626288 | 10.943442 | 4.723951  |
| C  | 13.278662 | 11.728925 | 4.416278  |

|    |           |           |           |
|----|-----------|-----------|-----------|
| C  | 13.658399 | 8.832663  | 8.482061  |
| H  | 12.718006 | 9.275483  | 8.122415  |
| H  | 13.828056 | 9.275822  | 9.478161  |
| C  | 17.210430 | 9.133879  | 7.128278  |
| H  | 18.200922 | 8.769295  | 7.406794  |
| C  | 14.806320 | 9.234295  | 7.581767  |
| C  | 16.101426 | 8.803481  | 7.908366  |
| H  | 16.238098 | 8.174731  | 8.791804  |
| C  | 17.046702 | 9.912063  | 5.980893  |
| H  | 17.903774 | 10.164452 | 5.354882  |
| C  | 13.304049 | 11.745135 | 1.956066  |
| H  | 13.188883 | 11.202060 | 1.018273  |
| C  | 14.652297 | 10.022412 | 6.416013  |
| C  | 10.702369 | 9.311778  | 4.976149  |
| C  | 10.029797 | 8.120877  | 4.573413  |
| H  | 8.969297  | 8.189299  | 4.322135  |
| C  | 12.082823 | 9.235361  | 5.306352  |
| C  | 9.901272  | 10.575565 | 5.015216  |
| H  | 9.328473  | 10.646858 | 4.075701  |
| H  | 10.557092 | 11.452581 | 5.060336  |
| C  | 12.734425 | 8.010358  | 5.185224  |
| H  | 13.800484 | 7.942238  | 5.402591  |
| C  | 8.911583  | 10.593472 | 6.199235  |
| H  | 8.327849  | 11.522696 | 6.175226  |
| H  | 9.453380  | 10.546744 | 7.154126  |
| H  | 8.212464  | 9.748198  | 6.158127  |
| C  | 10.686125 | 6.903091  | 4.469765  |
| H  | 10.149444 | 6.010254  | 4.147844  |
| C  | 12.048128 | 6.843430  | 4.771113  |
| H  | 12.593778 | 5.902435  | 4.687322  |
| C  | 13.476085 | 7.316742  | 8.631370  |
| H  | 13.255585 | 6.845406  | 7.663928  |
| H  | 12.642917 | 7.096452  | 9.311575  |
| H  | 14.374778 | 6.834298  | 9.037616  |
| Au | 12.079673 | 11.850705 | 7.623011  |
| N  | 10.944553 | 12.684200 | 9.139456  |
| C  | 10.324300 | 13.239898 | 9.947278  |
| C  | 9.549029  | 13.927892 | 10.953729 |
| H  | 9.225005  | 14.902072 | 10.561894 |
| H  | 10.155777 | 14.08412  | 11.856807 |
| H  | 8.662400  | 13.33342  | 11.215808 |

**Table S12** Geometry data of **2** for the optimized  $T_1$  state

|    |           |           |          |
|----|-----------|-----------|----------|
| Au | 14.778770 | 12.994131 | 7.737425 |
| P  | 13.904553 | 14.154919 | 5.951288 |
| C  | 13.782053 | 13.779489 | 3.215497 |
| H  | 14.025371 | 14.840572 | 3.196344 |
| C  | 11.160818 | 14.534136 | 5.575468 |
| H  | 11.315260 | 13.945401 | 4.671173 |
| C  | 13.631798 | 13.129363 | 4.457778 |
| N  | 16.096271 | 12.275207 | 9.173478 |
| C  | 13.195998 | 16.024473 | 8.499409 |
| H  | 14.138633 | 15.543927 | 8.195726 |
| H  | 12.970935 | 15.618416 | 9.499502 |

|   |           |           |           |
|---|-----------|-----------|-----------|
| C | 9.685436  | 15.740633 | 7.048547  |
| H | 8.688306  | 16.102435 | 7.305746  |
| C | 12.075792 | 15.626228 | 7.565080  |
| C | 10.773748 | 16.058522 | 7.860421  |
| H | 10.616615 | 16.673441 | 8.750015  |
| C | 9.878755  | 14.975019 | 5.897541  |
| H | 9.038554  | 14.731338 | 5.245771  |
| C | 13.619598 | 13.115215 | 2.003687  |
| H | 13.743295 | 13.658945 | 1.066406  |
| C | 12.259165 | 14.844450 | 6.398666  |
| C | 16.219375 | 15.538191 | 4.984819  |
| C | 16.900352 | 16.716733 | 4.562851  |
| H | 17.961772 | 16.638802 | 4.318103  |
| C | 14.835899 | 15.626812 | 5.303504  |
| C | 17.010950 | 14.269037 | 5.057862  |
| H | 17.569362 | 14.158083 | 4.112998  |
| H | 16.351475 | 13.397207 | 5.145221  |
| C | 14.189753 | 16.852077 | 5.156265  |
| H | 13.123168 | 16.929672 | 5.368525  |
| C | 18.014217 | 14.281048 | 6.229493  |
| H | 18.596344 | 13.350590 | 6.223350  |
| H | 17.483503 | 14.352927 | 7.188092  |
| H | 18.714384 | 15.123279 | 6.156115  |
| C | 16.250222 | 17.935425 | 4.434455  |
| H | 16.792687 | 18.819976 | 4.099611  |
| C | 14.886550 | 18.007924 | 4.729497  |
| H | 14.349080 | 18.952603 | 4.633942  |
| C | 16.687881 | 11.671354 | 9.974214  |
| C | 17.408085 | 10.914914 | 10.973848 |
| H | 18.030347 | 10.156362 | 10.478771 |
| H | 16.706490 | 10.415229 | 11.657754 |
| H | 18.060024 | 11.581582 | 11.555858 |
| C | 13.411957 | 17.539803 | 8.607921  |
| H | 13.697980 | 17.972709 | 7.639769  |
| H | 14.212479 | 17.761325 | 9.325876  |
| H | 12.504712 | 18.056636 | 8.947920  |
| P | 13.009647 | 10.717681 | 5.951288  |
| C | 13.132147 | 11.093111 | 3.215497  |
| H | 12.888829 | 10.032028 | 3.196344  |
| C | 15.753382 | 10.338464 | 5.575468  |
| H | 15.598940 | 10.927199 | 4.671173  |
| C | 13.282402 | 11.743237 | 4.457778  |
| C | 13.718202 | 8.848127  | 8.499409  |
| H | 12.775567 | 9.328673  | 8.195726  |
| H | 13.943265 | 9.254184  | 9.499502  |
| C | 17.228764 | 9.131967  | 7.048547  |
| H | 18.225894 | 8.770165  | 7.305746  |
| C | 14.838408 | 9.246372  | 7.565080  |
| C | 16.140452 | 8.814078  | 7.860421  |
| H | 16.297585 | 8.199159  | 8.750015  |
| C | 17.035445 | 9.897581  | 5.897541  |
| H | 17.875646 | 10.141262 | 5.245771  |
| C | 13.294602 | 11.757385 | 2.003687  |
| H | 13.170905 | 11.213655 | 1.066406  |

|    |           |           |           |
|----|-----------|-----------|-----------|
| C  | 14.655035 | 10.028150 | 6.398666  |
| C  | 10.694825 | 9.334409  | 4.984819  |
| C  | 10.013848 | 8.155867  | 4.562851  |
| H  | 8.952428  | 8.233798  | 4.318103  |
| C  | 12.078301 | 9.245788  | 5.303504  |
| C  | 9.903250  | 10.603563 | 5.057862  |
| H  | 9.344838  | 10.714517 | 4.112998  |
| H  | 10.562725 | 11.475393 | 5.145221  |
| C  | 12.724447 | 8.020523  | 5.156265  |
| H  | 13.791032 | 7.942928  | 5.368525  |
| C  | 8.899983  | 10.591552 | 6.229493  |
| H  | 8.317856  | 11.522010 | 6.223350  |
| H  | 9.430697  | 10.519673 | 7.188092  |
| H  | 8.199816  | 9.749321  | 6.156115  |
| C  | 10.663978 | 6.937175  | 4.434455  |
| H  | 10.121513 | 6.052624  | 4.099611  |
| C  | 12.027650 | 6.864676  | 4.729497  |
| H  | 12.565120 | 5.919997  | 4.633942  |
| C  | 13.502243 | 7.332797  | 8.607921  |
| H  | 13.216220 | 6.899891  | 7.639769  |
| H  | 12.701721 | 7.111275  | 9.325876  |
| H  | 14.409488 | 6.815964  | 8.947920  |
| Au | 12.135430 | 11.878469 | 7.737425  |
| N  | 10.817929 | 12.597393 | 9.173478  |
| C  | 10.226319 | 13.201246 | 9.974214  |
| C  | 9.506115  | 13.957686 | 10.973848 |
| H  | 8.883853  | 14.716238 | 10.478771 |
| H  | 10.207710 | 14.457371 | 11.657754 |
| H  | 8.854176  | 13.291018 | 11.555858 |

**Table S13** Geometry data of **2** for the optimized  $T_2$  state

|    |             |             |            |
|----|-------------|-------------|------------|
| Au | 14.81274784 | 12.99654590 | 7.61770456 |
| P  | 13.90135635 | 14.14190492 | 5.84836522 |
| C  | 13.86317566 | 13.76543267 | 3.13663119 |
| H  | 14.17196423 | 14.80968554 | 3.11464932 |
| C  | 11.16479753 | 14.50662250 | 5.58313846 |
| H  | 11.31266522 | 13.90533346 | 4.68481356 |
| C  | 13.67261049 | 13.13253306 | 4.39275828 |
| N  | 15.98448569 | 12.17910124 | 9.12965325 |
| C  | 13.24530697 | 16.03497990 | 8.45626339 |
| H  | 14.16779907 | 15.49547964 | 8.19048235 |
| H  | 12.99172794 | 15.69849816 | 9.47592012 |
| C  | 9.71495026  | 15.74534384 | 7.06071445 |
| H  | 8.72302663  | 16.11541600 | 7.32651951 |
| C  | 12.11497018 | 15.63418024 | 7.53681148 |
| C  | 10.81750607 | 16.07816521 | 7.84619714 |
| H  | 10.67848611 | 16.71220864 | 8.72593673 |
| C  | 9.88694172  | 14.95239377 | 5.92290142 |
| H  | 9.03485077  | 14.69785285 | 5.29079537 |
| C  | 13.66777021 | 13.11182363 | 1.93388404 |
| H  | 13.83165596 | 13.64212957 | 0.99583384 |
| C  | 12.27781615 | 14.83698693 | 6.37674501 |
| C  | 16.24417826 | 15.57875310 | 5.07366393 |

|   |             |             |             |    |             |             |             |
|---|-------------|-------------|-------------|----|-------------|-------------|-------------|
| C | 16.90093434 | 16.77516598 | 4.68037816  | H  | 8.31018913  | 11.42882924 | 6.45374176  |
| H | 17.97775222 | 16.73865156 | 4.50025278  | H  | 9.46709935  | 10.40415348 | 7.33913806  |
| C | 14.85695692 | 15.63059271 | 5.31158332  | H  | 8.19578372  | 9.65888555  | 6.34449042  |
| C | 17.07442072 | 14.33050709 | 5.18826550  | C  | 10.69944683 | 6.89481309  | 4.49110117  |
| H | 17.67400271 | 14.22828183 | 4.26890662  | H  | 10.15872460 | 6.00032525  | 4.17971002  |
| H | 16.43060524 | 13.44298788 | 5.23743823  | C  | 12.07247319 | 6.85993849  | 4.69789966  |
| C | 14.17067251 | 16.84126909 | 5.10601649  | H  | 12.63775136 | 5.93808090  | 4.55490433  |
| H | 13.09006563 | 16.87527052 | 5.24778595  | C  | 13.38974893 | 7.32956784  | 8.48516958  |
| C | 18.01725393 | 14.37091214 | 6.40424025  | H  | 13.03782615 | 6.97515774  | 7.50624336  |
| H | 18.60401087 | 13.44377076 | 6.45374176  | H  | 12.61659050 | 7.09624697  | 9.22892581  |
| H | 17.44710065 | 14.46844652 | 7.33913806  | H  | 14.28959729 | 6.75408217  | 8.74206531  |
| H | 18.71841628 | 15.21371445 | 6.34449042  | Au | 12.10145216 | 11.87605410 | 7.61770456  |
| C | 16.21475317 | 17.97778691 | 4.49110117  | N  | 10.92971431 | 12.69349876 | 9.12965325  |
| H | 16.75547540 | 18.87227475 | 4.17971002  | C  | 10.27816866 | 13.21108303 | 9.93850171  |
| C | 14.84172681 | 18.01266151 | 4.69789966  | C  | 9.46518541  | 13.85470402 | 10.94500502 |
| H | 14.27644864 | 18.93451910 | 4.55490433  | H  | 9.16193305  | 14.84967287 | 10.58995702 |
| C | 16.63603134 | 11.66151697 | 9.93850171  | H  | 10.03508858 | 13.96176151 | 11.87890768 |
| C | 17.44901459 | 11.0178959  | 10.94500502 | H  | 8.56552238  | 13.25400331 | 11.14058921 |
| H | 17.75226695 | 10.02292713 | 10.58995702 |    |             |             |             |
| H | 16.87911142 | 10.91083849 | 11.87890768 |    |             |             |             |
| H | 18.34867762 | 11.61859669 | 11.14058921 |    |             |             |             |
| C | 13.52445107 | 17.54303216 | 8.48516958  |    |             |             |             |
| H | 13.87637385 | 17.89744226 | 7.50624336  |    |             |             |             |
| H | 14.29760950 | 17.77635303 | 9.22892581  |    |             |             |             |
| H | 12.62460271 | 18.11851783 | 8.74206531  |    |             |             |             |
| P | 13.01284365 | 10.73069508 | 5.84836522  |    |             |             |             |
| C | 13.05102434 | 11.10716733 | 3.13663119  |    |             |             |             |
| H | 12.74223577 | 10.0629144  | 3.11464932  |    |             |             |             |
| C | 15.74940247 | 10.36597750 | 5.58313846  |    |             |             |             |
| H | 15.60153478 | 10.96726654 | 4.68481356  |    |             |             |             |
| C | 13.24158951 | 11.74006694 | 4.39275828  |    |             |             |             |
| C | 13.66889303 | 8.83762010  | 8.45626339  |    |             |             |             |
| H | 12.74640093 | 9.37712036  | 8.19048235  |    |             |             |             |
| H | 13.92247206 | 9.17410184  | 9.47592012  |    |             |             |             |
| C | 17.19924974 | 9.12725616  | 7.06071445  |    |             |             |             |
| H | 18.19117337 | 8.75718400  | 7.32651951  |    |             |             |             |
| C | 14.79922982 | 9.23841976  | 7.53681148  |    |             |             |             |
| C | 16.09669393 | 8.79443479  | 7.84619714  |    |             |             |             |
| H | 16.23571389 | 8.16039136  | 8.72593673  |    |             |             |             |
| C | 17.02725828 | 9.92020623  | 5.92290142  |    |             |             |             |
| H | 17.87934923 | 10.17474715 | 5.29079537  |    |             |             |             |
| C | 13.24642979 | 11.76077637 | 1.93388404  |    |             |             |             |
| H | 13.08254404 | 11.23047043 | 0.99583384  |    |             |             |             |
| C | 14.63638385 | 10.03561307 | 6.37674501  |    |             |             |             |
| C | 10.67002174 | 9.29384690  | 5.07366393  |    |             |             |             |
| C | 10.01326566 | 8.09743402  | 4.68037816  |    |             |             |             |
| H | 8.93644778  | 8.13394844  | 4.50025278  |    |             |             |             |
| C | 12.05724308 | 9.24200729  | 5.31158332  |    |             |             |             |
| C | 9.83977928  | 10.54209291 | 5.18826550  |    |             |             |             |
| H | 9.24019729  | 10.64431817 | 4.26890662  |    |             |             |             |
| H | 10.48359476 | 11.42961212 | 5.23743823  |    |             |             |             |
| C | 12.74352749 | 8.03133091  | 5.10601649  |    |             |             |             |
| H | 13.82413437 | 7.99732948  | 5.24778595  |    |             |             |             |
| C | 8.89694607  | 10.50168786 | 6.40424025  |    |             |             |             |

**Table S14** Geometry data of **3** for the optimized S<sub>1</sub> state

|    |           |           |          |
|----|-----------|-----------|----------|
| Au | 19.672359 | 6.575192  | 6.277153 |
| P  | 20.719676 | 7.628045  | 4.542535 |
| N  | 18.529591 | 5.758472  | 7.784393 |
| C  | 21.377624 | 8.925803  | 8.513959 |
| C  | 23.444960 | 7.981090  | 4.336770 |
| C  | 21.310740 | 9.595586  | 7.131671 |
| C  | 18.371392 | 9.043126  | 3.582622 |
| C  | 20.917715 | 7.266509  | 1.836972 |
| C  | 23.774463 | 9.565490  | 6.593891 |
| C  | 24.886653 | 9.192027  | 5.837759 |
| C  | 20.366958 | 10.357462 | 3.877981 |
| C  | 19.755521 | 9.124446  | 3.955568 |
| C  | 21.041478 | 6.579232  | 0.648057 |
| C  | 22.475037 | 9.159674  | 6.254472 |
| C  | 24.724047 | 8.394603  | 4.703549 |
| C  | 20.923817 | 6.618959  | 3.107310 |
| C  | 22.322472 | 8.353137  | 5.100522 |
| C  | 17.105842 | 7.469804  | 2.113338 |
| C  | 17.670780 | 10.249968 | 3.199629 |
| C  | 19.656766 | 11.538230 | 3.481051 |
| C  | 18.297421 | 11.476822 | 3.150738 |
| C  | 17.606624 | 7.765182  | 3.547283 |
| C  | 17.135681 | 4.421399  | 9.529154 |
| C  | 16.431119 | 7.814874  | 4.553956 |
| C  | 21.224399 | 11.122837 | 7.272330 |
| C  | 17.906912 | 5.157057  | 8.555538 |
| P  | 21.423187 | 4.163600  | 4.580796 |
| C  | 20.836266 | 2.901734  | 8.570221 |
| C  | 18.665885 | 3.878666  | 4.450934 |
| C  | 20.865595 | 2.246673  | 7.179604 |
| C  | 23.751220 | 2.804216  | 3.715642 |
| C  | 21.271325 | 4.507834  | 1.883331 |
| C  | 18.388538 | 2.286686  | 6.705345 |

|    |           |           |           |
|----|-----------|-----------|-----------|
| C  | 17.257310 | 2.661713  | 5.978351  |
| C  | 21.700898 | 1.475266  | 3.882705  |
| C  | 22.376545 | 2.698526  | 4.035087  |
| C  | 21.199613 | 5.166025  | 0.670276  |
| C  | 19.680052 | 2.695273  | 6.338514  |
| C  | 17.393948 | 3.463632  | 4.844096  |
| C  | 21.172473 | 5.174083  | 3.132669  |
| C  | 19.806375 | 3.507975  | 5.186265  |
| C  | 25.041190 | 4.540039  | 2.409910  |
| C  | 24.406433 | 1.642429  | 3.281715  |
| C  | 22.375591 | 0.342218  | 3.434307  |
| C  | 23.738288 | 0.426826  | 3.142962  |
| C  | 24.531370 | 4.105892  | 3.791749  |
| C  | 25.666662 | 4.025029  | 4.822172  |
| C  | 20.951627 | 0.717774  | 7.297285  |
| Au | 22.433710 | 5.287733  | 6.308588  |
| N  | 23.631671 | 6.091406  | 7.803748  |
| C  | 25.298548 | 7.136936  | 9.508587  |
| C  | 24.373788 | 6.558701  | 8.561467  |
| H  | 21.390178 | 7.830935  | 8.424364  |
| H  | 20.509505 | 9.214383  | 9.122448  |
| H  | 22.282612 | 9.238473  | 9.055184  |
| H  | 23.302282 | 7.358556  | 3.452108  |
| H  | 20.376925 | 9.251109  | 6.657504  |
| H  | 20.814082 | 8.350246  | 1.791492  |
| H  | 23.918922 | 10.204550 | 7.467747  |
| H  | 25.880813 | 9.537859  | 6.126979  |
| H  | 21.427675 | 10.448109 | 4.114142  |
| H  | 21.024263 | 7.120569  | -0.297530 |
| H  | 25.585288 | 8.102905  | 4.100986  |
| H  | 16.400088 | 8.228117  | 1.748231  |
| H  | 16.578139 | 6.507175  | 2.131008  |
| H  | 17.945176 | 7.393182  | 1.412364  |
| H  | 16.616598 | 10.167594 | 2.936002  |
| H  | 20.192875 | 12.487472 | 3.435577  |
| H  | 17.755119 | 12.374680 | 2.855014  |
| H  | 18.271547 | 6.948182  | 3.845633  |
| H  | 16.133014 | 4.215018  | 9.129839  |
| H  | 17.043499 | 5.008447  | 10.453613 |
| H  | 17.638047 | 3.469811  | 9.751931  |
| H  | 16.791820 | 7.996646  | 5.574693  |
| H  | 15.928369 | 6.839269  | 4.530700  |
| H  | 15.688462 | 8.582083  | 4.298204  |
| H  | 20.326618 | 11.403191 | 7.840004  |
| H  | 21.183297 | 11.626467 | 6.296613  |
| H  | 22.093128 | 11.527338 | 7.809766  |
| H  | 20.810400 | 3.998628  | 8.496624  |
| H  | 21.728143 | 2.616177  | 9.144820  |
| H  | 19.957051 | 2.568288  | 9.142134  |
| H  | 18.796989 | 4.474808  | 3.545847  |
| H  | 21.786416 | 2.583831  | 6.678122  |
| H  | 21.431218 | 3.429361  | 1.882211  |
| H  | 18.268498 | 1.629839  | 7.569893  |
| H  | 16.271874 | 2.302929  | 6.281818  |

|   |           |           |           |
|---|-----------|-----------|-----------|
| H | 20.635149 | 1.414092  | 4.103330  |
| H | 21.287887 | 4.602781  | -0.258200 |
| H | 16.519200 | 3.738391  | 4.252457  |
| H | 25.754641 | 3.812330  | 1.998312  |
| H | 25.560866 | 5.506582  | 2.483125  |
| H | 24.212695 | 4.645756  | 1.697107  |
| H | 25.468333 | 1.694426  | 3.034367  |
| H | 21.838727 | -0.599168 | 3.309924  |
| H | 24.281010 | -0.454181 | 2.796849  |
| H | 23.838889 | 4.893314  | 4.133731  |
| H | 25.282308 | 3.750222  | 5.815293  |
| H | 26.176251 | 4.996091  | 4.904186  |
| H | 26.418553 | 3.276908  | 4.534987  |
| H | 21.852792 | 0.434890  | 7.858269  |
| H | 21.003591 | 0.241141  | 6.310734  |
| H | 20.085106 | 0.303548  | 7.831983  |
| H | 26.282589 | 7.262394  | 9.035593  |
| H | 25.401469 | 6.475474  | 10.380181 |
| H | 24.928864 | 8.116871  | 9.841158  |

**Table S15** Geometry data of **3** for the optimized T<sub>1</sub> state

|    |           |           |          |
|----|-----------|-----------|----------|
| Au | 19.835980 | 6.527227  | 6.210141 |
| P  | 20.778902 | 7.658883  | 4.427638 |
| N  | 18.597202 | 5.770669  | 7.744410 |
| C  | 21.497765 | 8.963554  | 8.423432 |
| C  | 23.511191 | 7.905671  | 4.214852 |
| C  | 21.421616 | 9.580113  | 7.017078 |
| C  | 18.330406 | 8.964467  | 3.843971 |
| C  | 20.673901 | 7.250093  | 1.746532 |
| C  | 23.881032 | 9.496753  | 6.464907 |
| C  | 24.981243 | 9.097531  | 5.704922 |
| C  | 20.383895 | 10.310833 | 3.762409 |
| C  | 19.733077 | 9.085775  | 4.011356 |
| C  | 20.867648 | 6.592546  | 0.550189 |
| C  | 22.571999 | 9.111493  | 6.138149 |
| C  | 24.798885 | 8.297953  | 4.573746 |
| C  | 20.877367 | 6.618025  | 3.007129 |
| C  | 22.402430 | 8.303251  | 4.986414 |
| C  | 16.996028 | 7.118215  | 2.761738 |
| C  | 17.630965 | 10.102076 | 3.417158 |
| C  | 19.661287 | 11.418340 | 3.333230 |
| C  | 18.276572 | 11.312691 | 3.168783 |
| C  | 17.559768 | 7.676889  | 4.073760 |
| C  | 16.896841 | 4.690494  | 9.391340 |
| C  | 16.473418 | 7.834385  | 5.146852 |
| C  | 21.348250 | 11.112333 | 7.098109 |
| C  | 17.836609 | 5.289579  | 8.474469 |
| P  | 21.390127 | 4.169024  | 4.428457 |
| C  | 20.670690 | 2.861804  | 8.423409 |
| C  | 18.657389 | 3.927105  | 4.216166 |
| C  | 20.744910 | 2.246727  | 7.016308 |
| C  | 23.836672 | 2.859032  | 3.845079 |
| C  | 21.496642 | 4.576700  | 1.747181 |
| C  | 18.285347 | 2.335436  | 6.465442 |

|    |           |           |           |
|----|-----------|-----------|-----------|
| C  | 17.185610 | 2.737255  | 5.706125  |
| C  | 21.780960 | 1.515949  | 3.766044  |
| C  | 22.433870 | 2.740249  | 4.013268  |
| C  | 21.303332 | 5.233796  | 0.550518  |
| C  | 19.594976 | 2.718533  | 6.138517  |
| C  | 17.369071 | 3.537136  | 4.575331  |
| C  | 21.292907 | 5.209309  | 3.007449  |
| C  | 19.765628 | 3.527176  | 4.987251  |
| C  | 25.173346 | 4.701219  | 2.758919  |
| C  | 24.534030 | 1.719738  | 3.419340  |
| C  | 22.501549 | 0.406698  | 3.337973  |
| C  | 23.886346 | 0.509867  | 3.172775  |
| C  | 24.609675 | 4.145636  | 4.072274  |
| C  | 25.696536 | 3.988033  | 5.144821  |
| C  | 20.815440 | 0.714276  | 7.095424  |
| Au | 22.333710 | 5.301184  | 6.210281  |
| N  | 23.571505 | 6.057216  | 7.745468  |
| C  | 25.268947 | 7.134860  | 9.397044  |
| C  | 24.330802 | 6.536998  | 8.477716  |
| H  | 21.491738 | 7.865000  | 8.384808  |
| H  | 20.641025 | 9.291658  | 9.027814  |
| H  | 22.411012 | 9.285553  | 8.945494  |
| H  | 23.348480 | 7.300579  | 3.321470  |
| H  | 20.479583 | 9.235550  | 6.560245  |
| H  | 20.369138 | 8.296487  | 1.728255  |
| H  | 24.040837 | 10.146237 | 7.328269  |
| H  | 25.982570 | 9.432831  | 5.981818  |
| H  | 21.465596 | 10.381433 | 3.876683  |
| H  | 20.697729 | 7.118161  | -0.388979 |
| H  | 25.651298 | 8.005235  | 3.959244  |
| H  | 16.272386 | 7.816099  | 2.316479  |
| H  | 16.469474 | 6.171173  | 2.945020  |
| H  | 17.793027 | 6.941313  | 2.028044  |
| H  | 16.550594 | 10.039432 | 3.277024  |
| H  | 20.175270 | 12.356311 | 3.119652  |
| H  | 17.696611 | 12.178339 | 2.844859  |
| H  | 18.279527 | 6.919560  | 4.456381  |
| H  | 15.928593 | 4.552213  | 8.890031  |
| H  | 16.761419 | 5.342072  | 10.266061 |
| H  | 17.276629 | 3.713623  | 9.722288  |
| H  | 16.890288 | 8.224265  | 6.086590  |
| H  | 16.001554 | 6.862457  | 5.349550  |
| H  | 15.683386 | 8.523731  | 4.819021  |
| H  | 20.472252 | 11.416523 | 7.687001  |
| H  | 21.263619 | 11.565927 | 6.102999  |
| H  | 22.238483 | 11.531546 | 7.587784  |
| H  | 20.678715 | 3.960387  | 8.386051  |
| H  | 21.527164 | 2.531416  | 9.026925  |
| H  | 19.757160 | 2.540896  | 8.945643  |
| H  | 18.820929 | 4.532543  | 3.323166  |
| H  | 21.687350 | 2.590033  | 6.559354  |
| H  | 21.801298 | 3.530267  | 1.729404  |
| H  | 18.124654 | 1.685580  | 7.328362  |
| H  | 16.183752 | 2.403659  | 5.983164  |

|   |           |           |           |
|---|-----------|-----------|-----------|
| H | 20.699227 | 1.447167  | 3.881156  |
| H | 21.473507 | 4.707804  | -0.388392 |
| H | 16.516986 | 3.831912  | 3.961353  |
| H | 25.895477 | 4.001374  | 2.314285  |
| H | 25.701640 | 5.647668  | 2.940225  |
| H | 24.376089 | 4.878216  | 2.025525  |
| H | 25.614424 | 1.780459  | 3.278535  |
| H | 21.985931 | -0.530714 | 3.125894  |
| H | 24.464754 | -0.357133 | 2.849692  |
| H | 23.891477 | 4.904843  | 4.454208  |
| H | 25.279698 | 3.600373  | 6.085488  |
| H | 26.170217 | 4.959473  | 5.345611  |
| H | 26.485142 | 3.296809  | 4.817509  |
| H | 21.691212 | 0.407711  | 7.683419  |
| H | 20.898625 | 0.261765  | 6.099693  |
| H | 19.924711 | 0.296137  | 7.585116  |
| H | 26.236959 | 7.277362  | 8.896462  |
| H | 25.405773 | 6.480333  | 10.269341 |
| H | 24.886721 | 8.109552  | 9.731616  |

**Table S16** Geometry data of **3** for the optimized T<sub>2</sub> state

|    |             |             |             |
|----|-------------|-------------|-------------|
| Au | 19.93615018 | 5.87846956  | 6.80698795  |
| P  | 21.34709280 | 7.69207304  | 6.62687596  |
| N  | 18.28865294 | 4.70512805  | 7.27483171  |
| C  | 22.03328171 | 4.87009019  | 9.64630422  |
| H  | 21.76081231 | 4.36862720  | 8.70704984  |
| H  | 21.21981791 | 4.71935642  | 10.36923760 |
| H  | 22.93398150 | 4.38938034  | 10.05670435 |
| C  | 24.08759979 | 7.40914815  | 6.16618537  |
| H  | 23.86769437 | 7.89536144  | 5.21536760  |
| C  | 22.27398324 | 6.37205667  | 9.42148334  |
| H  | 21.32258805 | 6.79918991  | 9.06197887  |
| C  | 19.67323937 | 9.76294103  | 7.67722091  |
| C  | 21.70403092 | 9.76213611  | 4.83289053  |
| H  | 21.86752700 | 10.33683944 | 5.74329653  |
| C  | 24.65115395 | 6.20190458  | 8.60040487  |
| H  | 24.89094118 | 5.74570696  | 9.56328736  |
| C  | 25.66956383 | 6.38300491  | 7.66460458  |
| H  | 26.68714209 | 6.06536131  | 7.89917654  |
| C  | 21.97391130 | 9.75320265  | 8.45389500  |
| H  | 22.98450557 | 9.34434218  | 8.42421154  |
| C  | 20.97894323 | 9.19415559  | 7.65565287  |
| C  | 21.75081605 | 10.42797449 | 3.61129667  |
| H  | 21.94814811 | 11.50048120 | 3.58506814  |
| C  | 23.33040239 | 6.60523183  | 8.35231151  |
| C  | 25.38856937 | 6.99177211  | 6.44055362  |
| H  | 26.18062927 | 7.15465516  | 5.70807505  |
| C  | 21.45730763 | 8.37657299  | 4.92841265  |
| C  | 23.05648287 | 7.21671154  | 7.10416849  |
| C  | 18.07932572 | 10.38396772 | 5.83163503  |
| H  | 17.65444549 | 11.24336029 | 6.36825561  |
| H  | 17.29372186 | 9.98005844  | 5.17799788  |
| H  | 18.90434938 | 10.74342854 | 5.20262041  |
| C  | 19.42341733 | 10.85560741 | 8.55632257  |

|   |             |             |             |    |             |            |             |
|---|-------------|-------------|-------------|----|-------------|------------|-------------|
| H | 18.42082940 | 11.28513769 | 8.58191012  | C  | 22.37248142 | 4.71462362 | -0.76889499 |
| C | 21.70279918 | 10.84742767 | 9.30860126  | H  | 22.67361834 | 4.42646766 | -1.77655020 |
| H | 22.50291733 | 11.25539047 | 9.92833548  | C  | 24.06661418 | 5.79528053 | 2.46980997  |
| C | 20.41717042 | 11.39354487 | 9.36084664  | H  | 23.60610472 | 6.06686272 | 3.43041440  |
| H | 20.20011156 | 12.23498332 | 10.01962285 | C  | 25.00546783 | 4.60267650 | 2.73574338  |
| C | 18.55274887 | 9.27850477  | 6.79610390  | H  | 24.44984851 | 3.74514826 | 3.13812366  |
| H | 18.93024689 | 8.44725252  | 6.18364780  | H  | 25.76361891 | 4.89943264 | 3.47356734  |
| C | 16.45213026 | 2.85136302  | 7.35414498  | H  | 25.52981725 | 4.28245859 | 1.82511776  |
| H | 15.46041795 | 3.28129754  | 7.15511588  | C  | 19.19370152 | 2.14638802 | 2.17436060  |
| H | 16.44220183 | 2.38857195  | 8.35111036  | H  | 19.86956903 | 1.28511650 | 2.08281495  |
| H | 16.66800019 | 2.07639891  | 6.60382556  | H  | 19.27297603 | 2.74021007 | 1.25414016  |
| C | 17.38769151 | 8.72852320  | 7.64199067  | H  | 18.16734204 | 1.75741993 | 2.23265603  |
| H | 17.72397899 | 7.90971533  | 8.29193814  | Au | 22.04102173 | 4.63304896 | 5.31060684  |
| H | 16.60892616 | 8.33929959  | 6.97173202  | N  | 23.34334556 | 3.39512408 | 6.34944778  |
| H | 16.93319872 | 9.50752474  | 8.26919355  | C  | 24.74589518 | 2.17191165 | 8.18036346  |
| C | 22.62164908 | 7.07415847  | 10.74275613 | H  | 25.82081556 | 2.32337511 | 8.00854086  |
| H | 21.80957115 | 6.93492909  | 11.46949356 | H  | 24.53208964 | 1.09420204 | 8.14671030  |
| H | 22.77404483 | 8.15291049  | 10.60548917 | H  | 24.48058270 | 2.55667442 | 9.17623371  |
| H | 23.53850600 | 6.66184755  | 11.18716813 | C  | 23.97789596 | 2.85106295 | 7.16140134  |
| C | 17.46132398 | 3.88525539  | 7.30895407  |    |             |            |             |
| P | 21.05467800 | 5.82051843  | 3.59853885  |    |             |            |             |
| C | 19.46516710 | 2.10714292  | 4.69050356  |    |             |            |             |
| H | 19.74255061 | 2.68695198  | 5.58209727  |    |             |            |             |
| H | 20.14169319 | 1.24498083  | 4.61259382  |    |             |            |             |
| H | 18.44533023 | 1.71636815  | 4.82476246  |    |             |            |             |
| C | 18.38764833 | 6.64615690  | 3.70892031  |    |             |            |             |
| H | 18.81253249 | 7.65008367  | 3.72717998  |    |             |            |             |
| C | 19.55331486 | 2.96957153  | 3.42043935  |    |             |            |             |
| H | 20.60649510 | 3.28069697  | 3.31674839  |    |             |            |             |
| C | 22.96956715 | 5.41506841  | 1.51110905  |    |             |            |             |
| C | 21.31671973 | 8.33931773  | 2.49715399  |    |             |            |             |
| H | 21.15770685 | 7.79502022  | 1.56741871  |    |             |            |             |
| C | 17.30623899 | 4.09204564  | 3.62933138  |    |             |            |             |
| H | 16.86642175 | 3.09376760  | 3.57692459  |    |             |            |             |
| C | 16.46441192 | 5.19709355  | 3.75506175  |    |             |            |             |
| H | 15.38329349 | 5.05505334  | 3.80421401  |    |             |            |             |
| C | 20.63791269 | 5.15549758  | 0.88460071  |    |             |            |             |
| H | 19.57692600 | 5.20833185  | 1.13110196  |    |             |            |             |
| C | 21.58858078 | 5.45090268  | 1.85856459  |    |             |            |             |
| C | 21.53899045 | 9.71199947  | 2.43212169  |    |             |            |             |
| H | 21.55011748 | 10.21482224 | 1.46420552  |    |             |            |             |
| C | 18.70086108 | 4.22258675  | 3.54830311  |    |             |            |             |
| C | 17.00641187 | 6.48264822  | 3.79520754  |    |             |            |             |
| H | 16.35698961 | 7.35554840  | 3.87706611  |    |             |            |             |
| C | 21.28520233 | 7.63679546  | 3.71993825  |    |             |            |             |
| C | 19.23942047 | 5.53205949  | 3.59329131  |    |             |            |             |
| C | 24.84526720 | 7.02729020  | 1.96656838  |    |             |            |             |
| H | 25.36269401 | 6.82652076  | 1.01846335  |    |             |            |             |
| H | 25.60778781 | 7.30045308  | 2.70920264  |    |             |            |             |
| H | 24.17826907 | 7.88707749  | 1.82044930  |    |             |            |             |
| C | 23.32681592 | 5.02659237  | 0.18814092  |    |             |            |             |
| H | 24.38455834 | 4.9883853   | -0.07632391 |    |             |            |             |
| C | 21.01897505 | 4.78496710  | -0.42621852 |    |             |            |             |
| H | 20.24888146 | 4.55019728  | -1.16281165 |    |             |            |             |

## References

- S1. M. Hoshino, H. Sonoki, Y. Miyazaki, Y. Iimura and K. Yamamoto, *Inorg. Chem.*, 2000, **39**, 4850-4857.
- S2. M. Osawa, I. Kawata, S. Igawa, M. Hoshino, T. Fukunaga and D. Hashizume, *Chem. - Eur. J.*, 2010, 12114-12126.
- S3. Rigaku Oxford Diffraction, CrysAlisPro, Rigaku Corporation, Tokyo, Japan. 2015.
- S4. G. M. Sheldrich, *Acta Cryst.* 2015, **A71**, 3.
- S5. G. M. Sheldrich, *Acta Cryst.* 2015, **C71**, 3.
- S6. (a) J. P. Perdew, K. Burke, M. Ernzerhof, *Phys. Rev. Lett.* 1996, **77**, 3865-3868; (b) J. P. Perdew, K. Burke, M. Ernzerhof, *Phys. Rev. Lett.* 1997, **78**, 1396-.
- S7. S. Grimme, S. Ehrlich, L. Goerigk, *J. Comput. Chem.* 2011, **32**, 1456-1465.
- S8. D. P. Chong, *Molecular Physics* 2005, **103**, 749-761.
- S9. ADF2019.303 SCM, Theoretical Chemistry, Vrije Universiteit, Amsterdam, The Netherlands, <http://www.scm.com>
- S10. (a) E. Van Lenthe, E. J. Baerends, *J. Comput. Chem.* 2003, **24**, 1142-1156; (b) E. van Lenthe, E. J. Baerends, and J. G. Snijders *J. Chem. Phys.* 1993, **99**, 4597-4610; (c) E. van Lenthe, E. J. Baerends, and J. G. Snijders *J. Chem. Phys.* 1994, 101, 9783-9792; (d) E. van Lenthe, E. J. Baerends, and J. G. Snijders *J. Chem. Phys.* 1999, 110, 8943-8952; (e) S. J. A. van Gisbergen, J. G. Snijders and E. J. Baerends, *Comput. Phys. Commun.* 1999, **118**, 119-139; (f) F. Wang and T. Ziegler *J. Chem. Phys.* 2005, **123**, 154102-12.
- S11. R. G. Parr and W. Yang, *Density-functional Theory of Atoms and Molecule*; Oxford University Press: Oxford, U. K., 1994.
- S12. (a) R. L. Martin, *J. Chem. Phys.*, 2003, **118**, 4775-4777; (b) E. R. Batista and R. L.; Martin, *J. Phys. Chem. A*, 2005, **109**, 3128-3133; (c) E. R. Batista and R. L. Martin, *J. Phys. Chem. A*, 2005, **109**, 9856-9859; (d) L.E. Roy, G. Scalmani, R. Kobayashi and E.R. Batista, *Dalton Trans.*, 2009, 6719-6721.
